# Supplementary material for: A consensus list of ultrasound competencies for graduating emergency medicine residents
Source: PubMed Central journal article supplement (PMC9677397; doi:10.1002/aet2.10817), 2022-11-21
Supplement: AET2-6-e10817-s001.pdf [file AET2-6-e10817-s001.pdf]

**Supplemental Table 1. Results of Round 1 and Round 2 of Delphi Voting**

| General Principles                                                           | Round 1 Mean (SD) | Round 1 Level of Agreement | Round 2 Mean (SD) | Round 2 Level of Agreement |
|------------------------------------------------------------------------------|-------------------|----------------------------|-------------------|----------------------------|
| Identifies need to accurately label images with patient information          | 4.53 (0.52)       | High                       | 4.75 (0.58)       | High                       |
| Places patient in appropriate position                                       | 4.07 (0.59)       | High                       | 4.56 (0.51)       | High                       |
| Explains the exam to be performed to the patient                             | 4.27 (0.8)        | High                       | 4.56 (0.51)       | High                       |
| Selects appropriate probe                                                    | 4.80 (0.41)       | High                       | 5.00 (0.00)       | High                       |
| Selects appropriate exam pre-set                                             | 4.20 (0.68)       | High                       | 4.69 (0.48)       | High                       |
| Adjusts depth to adequately identify all relevant anatomy and pathology      | 4.67 (0.62)       | High                       | 4.88 (0.34)       | High                       |
| Adjusts gain to appropriately identify all relevant structures and pathology | 4.73 (0.46)       | High                       | 4.88 (0.34)       | High                       |
| Assures proper cleaning of probe before and after use                        | 4.67 (0.49)       | High                       | 4.94 (0.25)       | High                       |
| Relays findings to patient care team                                         | 4.80 (0.41)       | High                       | 4.88 (0.34)       | High                       |
| Appropriately documents all findings in the medical record                   | 4.87 (0.35)       | High                       | 5.00 (0.00)       | High                       |

| Physics                                   | Round 1 Mean (SD) | Round 1 Level of Agreement | Round 2 Mean (SD) | Round 2 Level of Agreement |
|-------------------------------------------|-------------------|----------------------------|-------------------|----------------------------|
| Identifies beam width artifact            | 3.40 (0.91)       | Low                        | 3.50 (0.73)       | Low                        |
| Identifies posterior acoustic enhancement | 4.40 (0.63)       | High                       | 4.75 (0.45)       | High                       |
| Identifies acoustic shadowing             | 4.80 (0.41)       | High                       | 4.81 (0.54)       | High                       |
| Identifies mirror artifact                | 3.93 (0.96)       | Low                        | 4.31 (0.48)       | High                       |
| Identifies side lobe artifact             | 3.67 (0.9)        | Low                        | 3.75 (0.77)       | Medium                     |
| Identifies aliasing                       | 3.20 (1.01)       | Low                        | 3.44 (0.73)       | Low                        |

| Trauma: Normal Anatomy                             | Round 1 Mean (SD) | Round 1 Level of Agreement | Round 2 Mean (SD) | Round 2 Level of Agreement |
|----------------------------------------------------|-------------------|----------------------------|-------------------|----------------------------|
| Identify liver                                     | 4.80 (0.77)       | High                       | 5.00 (0.00)       | High                       |
| Identify kidney                                    | 5.00 (0.00)       | High                       | 5.00 (0.00)       | High                       |
| Identify diaphragm                                 | 4.93 (0.26)       | High                       | 5.00 (0.00)       | High                       |
| Identify spine                                     | 4.67 (0.62)       | High                       | 4.88 (0.50)       | High                       |
| Identify Morison's pouch                           | 5.00 (0.00)       | High                       | 5.00 (0.00)       | High                       |
| Identify splenorenal space                         | 5.00 (0.00)       | High                       | 5.00 (0.00)       | High                       |
| Identify splenodiaphragmatic space                 | 5.00 (0.00)       | High                       | 5.00 (0.00)       | High                       |
| Identifies stomach                                 | 3.87 (0.92)       | Low                        | 3.81 (0.66)       | Low                        |
| Identify paracolic gutter bilaterally              | 4.33 (0.82)       | High                       | 4.13 (0.81)       | High                       |
| Identify pleural space bilaterally                 | 4.87 (0.35)       | High                       | 5.00 (0.00)       | High                       |
| Identify bladder in transverse and sagittal planes | 4.93 (0.26)       | High                       | 4.88 (0.50)       | High                       |
| Identify uterus in a female patient                | 4.87 (0.52)       | High                       | 4.81 (0.54)       | High                       |
| Identify prostate in a male patient                | 4.13 (0.99)       | Low                        | 4.31 (0.70)       | High                       |
| Identify Pouch of Douglas in a female patient      | 4.67 (0.72)       | High                       | 4.88 (0.34)       | High                       |
| Identify recto-vesicular space in a male patient   | 4.67 (0.72)       | High                       | 4.75 (0.58)       | High                       |
| Identify ribs                                      | 4.80 (0.56)       | High                       | 4.88 (0.34)       | High                       |
| Identify lung pleura                               | 4.93 (0.26)       | High                       | 5.00 (0.00)       | High                       |
| Identify lung sliding                              | 4.93 (0.26)       | High                       | 5.00 (0.00)       | High                       |

| Trauma: Pathology                                                                                                 | Round 1 Mean (SD) | Round 1 Level of Agreement | Round 2 Mean (SD) | Round 2 Level of Agreement |
|-------------------------------------------------------------------------------------------------------------------|-------------------|----------------------------|-------------------|----------------------------|
| Intra-abdominal hemorrhage - Identify the anechoic appearance of intra-abdominal free fluid                       | 5.00 (0.00)       | High                       | 5.00 (0.00)       | High                       |
| Intra-abdominal hemorrhage - Identify the hypoechoic/mixed echogenic appearance of clotting intraperitoneal blood | 4.27 (0.8)        | High                       | 4.44 (0.51)       | High                       |
| Intra-abdominal hemorrhage - Identify potential spaces where intra-abdominal blood can accumulate                 | 4.93 (0.26)       | High                       | 5.00 (0.00)       | High                       |
| Intra-abdominal hemorrhage - Identify fascial tissue defects under ultrasound guidance after penetrating injury   | 2.53 (1.13)       | Low                        | 2.19 (0.83)       | Low                        |
| Pneumothorax - Identify loss of lung sliding                                                                      | 5.00 (0.00)       | High                       | 5.00 (0.00)       | High                       |
| Pneumothorax - Identify the appearance of the lung point                                                          | 4.13 (0.92)       | Low                        | 4.38 (0.81)       | High                       |
| Pneumothorax - Demonstrate the barcode sign in M-mode                                                             | 4.00 (0.85)       | Low                        | 3.69 (0.70)       | Medium                     |
| Pleural Effusion/Hemothorax - Identify the pleural space where pleural fluid will accumulate                      | 4.87 (0.35)       | High                       | 4.88 (0.50)       | High                       |
| Pleural Effusion/Hemothorax - Identify the appearance of anechoic pleural fluid                                   | 4.87 (0.35)       | High                       | 4.88 (0.50)       | High                       |
| Pleural Effusion/Hemothorax - Identify the appearance of mixed-echogenicity complex pleural fluid                 | 4.2 (0.86)        | High                       | 4.06 (0.68)       | High                       |
| Pleural Effusion/Hemothorax - Identify the spine sign                                                             | 4.53 (0.74)       | High                       | 4.81 (0.54)       | High                       |

| Aorta: Normal Anatomy                                     | Round 1 Mean (SD) | Round 1 Level of Agreement | Round 2 Mean (SD) | Round 2 Level of Agreement |
|-----------------------------------------------------------|-------------------|----------------------------|-------------------|----------------------------|
| Identify aorta in transverse, sagittal, and coronal plane | 4.80 (0.41)       | High                       | 4.75 (0.58)       | High                       |
| Identify spine                                            | 4.80 (0.41)       | High                       | 4.81 (0.54)       | High                       |
| Identify inferior vena cava (IVC)                         | 4.93 (0.26)       | High                       | 4.88 (0.50)       | High                       |
| Identify celiac axis                                      | 4.00 (0.93)       | Low                        | 4.19 (0.83)       | High                       |
| Identify superior mesenteric artery (SMA)                 | 4.33 (0.82)       | High                       | 4.44 (0.73)       | High                       |
| Identify aortic bifurcation                               | 4.87 (0.35)       | High                       | 4.69 (0.60)       | High                       |
| Identify renal arteries                                   | 2.93 (0.96)       | Low                        | 3 (0.89)          | Low                        |
| Identify left renal vein                                  | 3.27 (1.03)       | Low                        | 3.31 (1.08)       | Low                        |
| Identify splenic vein                                     | 3.4 (1.12)        | Low                        | 3.44 (1.03)       | Low                        |

| Aorta: Pathology                                                                             | Round 1 Mean (SD) | Round 1 Level of Agreement | Round 2 Mean (SD) | Round 2 Level of Agreement |
|----------------------------------------------------------------------------------------------|-------------------|----------------------------|-------------------|----------------------------|
| Aortic Aneurysm - Measure abdominal aorta in transverse in proximal, mid, and distal abdomen | 4.67 (0.62)       | High                       | 4.69 (0.48)       | High                       |
| Aortic Aneurysm - Measure outer to outer wall in anterior to posterior plane                 | 4.8 (0.56)        | High                       | 4.88 (0.34)       | High                       |
| Aortic Aneurysm - Measure outer to outer wall                                                | 4.6 (0.51)        | High                       | 4.88 (0.34)       | High                       |
| Aortic Aneurysm - Identifies aortic atheromatous plaques                                     | 3.13 (1.06)       | Low                        | 3.19 (0.83)       | Low                        |
| Aortic Dissection - Identify aortic dissection flap                                          | 4.40 (0.83)       | High                       | 4.44 (0.63)       | High                       |
| Aortic Dissection - Evaluate the area of dissection with color flow                          | 3.13 (0.83)       | Low                        | 3.06 (0.85)       | Low                        |
| Aortic Dissection - Identify variations in flow across the dissection flap                   | 2.40 (0.99)       | Low                        | 2.63 (1.02)       | Low                        |

|                                                                                                       |                |      |                |      |
|-------------------------------------------------------------------------------------------------------|----------------|------|----------------|------|
| Aortic Dissection - Evaluate for level of dissection extension from aortic root to aortic bifurcation | 3.13<br>(1.19) | Low  | 3.06<br>(0.85) | Low  |
| Aortic Dissection - Measure aortic root                                                               | 4.40<br>(0.83) | High | 4.31<br>(0.70) | High |
| Aortic Dissection - Evaluate for level of dissection extension up carotid arteries bilaterally        | 2.87<br>(0.83) | Low  | 2.81<br>(0.40) | Low  |

| Lung: Normal Anatomy                                                        | Round 1<br>Mean<br>(SD) | Round 1<br>Level of<br>Agreement | Round 2<br>Mean<br>(SD) | Round 2<br>Level of<br>Agreement |
|-----------------------------------------------------------------------------|-------------------------|----------------------------------|-------------------------|----------------------------------|
| Normal Anatomy - Identify the different zones of the lung (Upper/Mid/Lower) | 4.33<br>(0.82)          | High                             | 4.13<br>(0.81)          | High                             |
| Normal Anatomy - Identify A-lines                                           | 4.8<br>(0.56)           | High                             | 4.69<br>(0.60)          | High                             |
| Normal Anatomy - Identify Z-lines                                           | 3.53<br>(1.25)          | Low                              | 3.44<br>(0.96)          | Low                              |

| Lung: Pathology                                                                                                                             | Round 1<br>Mean<br>(SD) | Round 1<br>Level of<br>Agreement | Round 2<br>Mean<br>(SD) | Round 2<br>Level of<br>Agreement |
|---------------------------------------------------------------------------------------------------------------------------------------------|-------------------------|----------------------------------|-------------------------|----------------------------------|
| Interstitial Pulmonary Fluid - Identify B-lines                                                                                             | 5.00<br>(0.00)          | High                             | 4.94<br>(0.25)          | High                             |
| Interstitial Pulmonary Fluid - identify pulmonary edema pattern of diffuse bilateral B-lines                                                | 4.87<br>(0.52)          | High                             | n/a                     | n/a                              |
| Interstitial Pulmonary Fluid - Identify acute respiratory distress syndrome (ARDS) pattern of patchy bilateral B-lines                      | 3.73<br>(0.80)          | Low                              | n/a                     | n/a                              |
| Interstitial Pulmonary Fluid – Identify interstitial lung disease and interstitial pulmonary fluid pattern of diffuse B-lines at lung bases | 3.0<br>(1.00)           | Low                              | n/a                     | n/a                              |
| Identify differential for diffuse bilateral B-line pattern                                                                                  | n/a                     | n/a                              | 4.81<br>(0.40)          | High                             |
| Identify differential for focal bilateral B-line pattern                                                                                    | n/a                     | n/a                              | 4.69<br>(0.48)          | High                             |
| Pneumonia - Identify pneumonia pattern of focal B-line appearance                                                                           | 4.4<br>(0.51)           | High                             | 4.56<br>(0.51)          | High                             |

|                                              |                |      |                |      |
|----------------------------------------------|----------------|------|----------------|------|
| Pneumonia - Identify lung consolidation      | 4.53<br>(0.52) | High | 4.63<br>(0.50) | High |
| Pneumonia - Identify subpleural effusion     | 4.13<br>(0.64) | High | 4.06<br>(0.77) | High |
| Pneumonia - Identify static air bronchograms | 3.33<br>(1.05) | Low  | 3.44<br>(0.81) | Low  |
| Pneumonia - Identify mobile air bronchograms | 3.4<br>(1.12)  | Low  | 3.44<br>(0.81) | Low  |

| Cardiac: Normal Anatomy                                                                                         | Round 1<br>Mean<br>(SD) | Round 1<br>Level of<br>Agreement | Round 2<br>Mean<br>(SD) | Round 2<br>Level of<br>Agreement |
|-----------------------------------------------------------------------------------------------------------------|-------------------------|----------------------------------|-------------------------|----------------------------------|
| Identify right atrium (RA) in apical four chamber and subxiphoid views                                          | 4.87<br>(0.35)          | High                             | 4.88<br>(0.34)          | High                             |
| Identify right ventricle (RV) in parasternal long, parasternal short, apical four chamber, and subxiphoid views | 5.00<br>(0.00)          | High                             | 4.94<br>(0.25)          | High                             |
| Identify left atrium (LA) in parasternal long, apical four chamber, and subxiphoid views                        | 4.8<br>(0.56)           | High                             | 4.94<br>(0.25)          | High                             |
| Identify left ventricle (LV) in parasternal long, parasternal short, apical four chamber, and subxiphoid views  | 5.00<br>(0.00)          | High                             | 4.94<br>(0.25)          | High                             |
| Identify aortic outflow tract in parasternal long and apical four chamber views                                 | 4.8<br>(0.41)           | High                             | 4.88<br>(0.34)          | High                             |
| Identify descending thoracic aorta in parasternal long view                                                     | 4.6<br>(0.63)           | High                             | 4.75<br>(0.58)          | High                             |
| Identify mitral valve in parasternal long, parasternal short, apical four chamber, and subxiphoid views         | 4.73<br>(0.46)          | High                             | 4.94<br>(0.25)          | High                             |
| Identify tricuspid valve in apical four chamber and subxiphoid views                                            | 4.6<br>(0.63)           | High                             | 4.75<br>(0.45)          | High                             |
| Identify aortic valve in parasternal long, apical four chamber, and subxiphoid views                            | 4.47<br>(0.83)          | High                             | 4.81<br>(0.40)          | High                             |
| Identify papillary muscles                                                                                      | 4.6<br>(0.63)           | High                             | 4.75<br>(0.58)          | High                             |
| Identify cardiac apex in parasternal short                                                                      | 3.93<br>(0.8)           | High                             | 3.75<br>(0.77)          | Medium                           |
| Identify pericardium                                                                                            | 4.93<br>(0.26)          | High                             | 4.94<br>(0.25)          | High                             |
| Identify IVC in long and short axis                                                                             | 4.87<br>(0.35)          | High                             | 4.88<br>(0.34)          | High                             |
| Identify hepatic vein confluence with IVC                                                                       | 4.27<br>(0.96)          | High                             | 4.44<br>(0.51)          | High                             |

|                                                                                                                                                                   |                |     |          |     |
|-------------------------------------------------------------------------------------------------------------------------------------------------------------------|----------------|-----|----------|-----|
| Identify structures using transesophageal echo via mid-esophageal 4 chamber, mid esophageal long axis, transgastric short axis, Bicaval, and thoracic aorta views | 2.07<br>(0.80) | Low | 2 (0.63) | Low |
|-------------------------------------------------------------------------------------------------------------------------------------------------------------------|----------------|-----|----------|-----|

| Cardiac: Pathology                                                                                                                                                                                               | Round 1 Mean (SD) | Round 1 Level of Agreement | Round 2 Mean (SD) | Round 2 Level of Agreement |
|------------------------------------------------------------------------------------------------------------------------------------------------------------------------------------------------------------------|-------------------|----------------------------|-------------------|----------------------------|
| Cardiac Arrest - Identify sonographic appearance of cardiac standstill                                                                                                                                           | 4.80<br>(0.56)    | High                       | 4.94<br>(0.25)    | High                       |
| Cardiac Arrest - Identify sonographic appearance of ventricular fibrillation                                                                                                                                     | 4.27<br>(1.1)     | High                       | 4.19<br>(0.83)    | High                       |
| Cardiac Arrest - Identify sonographic appearance of agonal cardiac activity                                                                                                                                      | 4.40<br>(0.74)    | High                       | 4.44<br>(0.63)    | High                       |
| Decreased Ejection Fraction - Accurately characterize ejection fraction into hyperdynamic/normal/mildly depressed/moderately depressed/severely depressed using subjective interpretation of cardiac contraction | 4.80<br>(0.41)    | High                       | 4.81<br>(0.4)     | High                       |
| Pathology - Decreased Ejection Fraction - Level of Importance - Quantitatively measure LV Ejection Fraction                                                                                                      | n/a               | n/a                        | 3.06<br>(1.12)    | Low                        |
| Decreased Ejection Fraction - Calculate ejection fraction using E-point septal separation                                                                                                                        | 3.53<br>(0.99)    | Low                        | 3.31<br>(0.87)    | Low                        |
| Decreased Ejection Fraction - Calculate ejection fraction using fractional shortening                                                                                                                            | 2.27<br>(0.96)    | Low                        | 2.00<br>(0.63)    | Low                        |
| Decreased Ejection Fraction - Calculate the ejection fraction using Simpson's method of discs                                                                                                                    | 1.80<br>(0.77)    | Low                        | 1.63<br>(0.72)    | Low                        |
| Cardiac Tamponade - Identifies where pericardial fluid accumulates                                                                                                                                               | 4.93<br>(0.26)    | High                       | 4.88<br>(0.34)    | High                       |
| Cardiac Tamponade - Identifies right atrial collapse                                                                                                                                                             | 4.33<br>(0.82)    | High                       | 4.5<br>(0.63)     | High                       |
| Cardiac Tamponade - Identifies right ventricular collapse                                                                                                                                                        | 4.8<br>(0.41)     | High                       | 4.94<br>(0.25)    | High                       |
| Cardiac Tamponade - Identifies plethoric IVC                                                                                                                                                                     | 5.00<br>(0.00)    | High                       | 4.94<br>(0.25)    | High                       |
| Cardiac Tamponade - Identifies mitral inflow variation                                                                                                                                                           | 2.87<br>(1.06)    | Low                        | 2.81<br>(0.54)    | Low                        |
| Valvular - Identifies mitral regurgitation using color doppler assessment                                                                                                                                        | 3.07<br>(0.8)     | Low                        | 2.88<br>(0.62)    | Low                        |

|                                                                                                                                  |                |      |                |      |
|----------------------------------------------------------------------------------------------------------------------------------|----------------|------|----------------|------|
| Valvular - Identifies tricuspid regurgitation using color doppler assessment                                                     | 3.00<br>(0.85) | Low  | 2.75<br>(0.58) | Low  |
| Valvular - Identifies aortic regurgitation using color doppler assessment                                                        | 3.00<br>(1.07) | Low  | 2.88<br>(0.62) | Low  |
| Valvular -Identifies mitral stenosis using mitral valve area assessment                                                          | 1.67<br>(0.72) | Low  | 1.44<br>(0.63) | Low  |
| Valvular -Identifies mitral stenosis using continuity equation assessment                                                        | 1.4<br>(0.51)  | Low  | 1.25<br>(0.45) | Low  |
| Valvular - Identifies mitral stenosis using proximal isovelocity surface area assessment                                         | 1.47<br>(0.52) | Low  | 1.25<br>(0.45) | Low  |
| Valvular - Identifies aortic stenosis using jet velocity assessment                                                              | 1.67<br>(0.62) | Low  | 1.56<br>(0.73) | Low  |
| Valvular - Identifies aortic stenosis using peak gradient assessment                                                             | 1.53<br>(0.52) | Low  | 1.44<br>(0.63) | Low  |
| Valvular - Identifies aortic stenosis using aortic valve area assessment                                                         | 1.53<br>(0.52) | Low  | 1.38<br>(0.50) | Low  |
| Valvular - Identifies vegetation on valve                                                                                        | 4.13<br>(0.74) | High | 3.94<br>(0.57) | High |
| Valvular - Measures aortic root diameter                                                                                         | 4.6<br>(0.51)  | High | 4.44<br>(0.63) | High |
| Valvular - Evaluates for aortic root excursion                                                                                   | 2.13<br>(1.30) | Low  | 1.94<br>(0.77) | Low  |
| Volume Assessment - Demonstrate evaluation of IVC collapsibility 2 centimeters inferior from the confluence of the hepatic veins | 4.33<br>(1.11) | High | 4.5<br>(0.52)  | High |
| Volume Assessment - Identifies plethoric IVC                                                                                     | 4.87<br>(0.35) | High | 4.94<br>(0.25) | High |
| Volume Assessment - Identifies collapsed IVC                                                                                     | 4.87<br>(0.35) | High | 4.94<br>(0.25) | High |
| Volume Assessment - Identify common carotid and measure VTi for volume responsiveness                                            | 1.80<br>(0.68) | Low  | 1.63<br>(0.72) | Low  |
| Volume Assessment - Measure peak velocity variation of common carotid artery to estimate preload                                 | 1.67<br>(0.72) | Low  | 1.31<br>(0.48) | Low  |
| Elevated Right Heart Pressure - Identifies the D sign                                                                            | 5.00<br>(0.00) | High | 4.94<br>(0.25) | High |
| Elevated Right Heart Pressure - Identifies an increased RV:LV ratio                                                              | 4.93<br>(0.26) | High | 4.88<br>(0.34) | High |
| Elevated Right Heart Pressure - Measures RV in apical 4 chamber                                                                  | 3.53<br>(1.46) | Low  | 2.75<br>(0.77) | Low  |
| Elevated Right Heart Pressure - Measures LV in apical 4 chamber                                                                  | 3.53<br>(1.46) | Low  | 2.75<br>(0.77) | Low  |



|                                                                                                                         |                |      |                |        |
|-------------------------------------------------------------------------------------------------------------------------|----------------|------|----------------|--------|
| Elevated Right Heart Pressure - Demonstrates a TAPSE measurement at the free RV tricuspid annulus                       | 3.67<br>(0.49) | Low  | 3.56<br>(0.73) | Low    |
| Elevated Right Heart Pressure - Demonstrates a RVSP measurement using continuous wave doppler                           | 1.87<br>(0.74) | Low  | 1.63<br>(0.62) | Low    |
| Myocardial Infarction - Identifies the septal wall of the heart on parasternal short                                    | 4.47<br>(0.74) | High | 4.19<br>(0.91) | High   |
| Myocardial Infarction - Identifies the anterior wall of the heart on parasternal short                                  | 4.40<br>(0.74) | High | 4.00<br>(0.82) | High   |
| Myocardial Infarction - Identifies the lateral wall of the heart on parasternal short                                   | 4.40<br>(0.74) | High | 4.00<br>(0.82) | High   |
| Myocardial Infarction - Identifies the posterior wall of the heart on parasternal short                                 | 4.33<br>(0.72) | High | 4.00<br>(0.82) | High   |
| Myocardial Infarction - Identifies the inferior wall of the heart on parasternal short                                  | 4.33<br>(0.72) | High | 4.00<br>(0.82) | High   |
| Myocardial Infarction - Identifies abnormal regional wall motion                                                        | n/a            | n/a  | 3.88<br>(0.89) | Medium |
| Myocardial Infarction - Identifies hypokinesis of a regional wall                                                       | 3.40<br>(0.91) | Low  | 3.19<br>(0.91) | Low    |
| Myocardial Infarction - Identifies akinesis of a regional wall                                                          | 3.80<br>(0.68) | Low  | 3.69<br>(0.79) | Low    |
| Diastolic Dysfunction - Demonstrates a measurement of the E and A wave using pulse wave doppler                         | 2.6<br>(1.24)  | Low  | 2.25<br>(0.93) | Low    |
| Diastolic Dysfunction - Identifies normal E:A ratio                                                                     | 2.47<br>(1.19) | Low  | 2.06<br>(0.77) | Low    |
| Diastolic Dysfunction - Identifies abnormal E:A ratio                                                                   | 2.47<br>(1.19) | Low  | 2.06<br>(0.77) | Low    |
| Diastolic Dysfunction - Performs tissue doppler imaging of the mitral annulus                                           | 2.07<br>(0.96) | Low  | 1.81<br>(0.54) | Low    |
| Diastolic Dysfunction - Identifies normal e':a' ratio                                                                   | 2.07<br>(0.96) | Low  | 1.81<br>(0.54) | Low    |
| Diastolic Dysfunction - Identifies abnormal e':a' ratio                                                                 | 2.07<br>(0.96) | Low  | 1.81<br>(0.54) | Low    |
| Diastolic Dysfunction - Calculates E:e'                                                                                 | 2.07<br>(0.96) | Low  | 1.69<br>(0.6)  | Low    |
| Diastolic Dysfunction - Estimates RV:LV ratio                                                                           | 3.67<br>(1.45) | Low  | 3.63<br>(1.50) | Medium |
| Diastolic Dysfunction - Obtains and Calculates septal and mitral annular excursion velocity                             | 1.80<br>(0.86) | Low  | 1.50<br>(0.63) | Low    |
| Structural Abnormalities - Identifies contrast moving across septal wall indicating atrial or ventricular septal defect | 2.07<br>(0.80) | Low  | 1.94<br>(0.57) | Low    |

|                                                                                                                    |               |     |                |     |
|--------------------------------------------------------------------------------------------------------------------|---------------|-----|----------------|-----|
| Structural Abnormalities - Identifies color flow across septal wall indicating atrial or ventricular septal defect | 2.4<br>(1.12) | Low | 1.94<br>(0.57) | Low |
| Structural Abnormalities - Recognizes contrast in RV in bubble study                                               | 2.6<br>(1.35) | Low | 2.38<br>(0.89) | Low |

| Obstetrics & Gynecology: Normal Anatomy                                        | Round 1<br>Mean<br>(SD) | Round 1<br>Level of<br>Agreement | Round 2<br>Mean<br>(SD) | Round 2<br>Level of<br>Agreement |
|--------------------------------------------------------------------------------|-------------------------|----------------------------------|-------------------------|----------------------------------|
| Identifies uterus in transverse axis using transabdominal approach             | 4.73<br>(0.59)          | High                             | 4.94<br>(0.25)          | High                             |
| Identifies uterus in the sagittal axis using the transabdominal approach       | 4.73<br>(0.59)          | High                             | 4.94<br>(0.25)          | High                             |
| Identifies uterus in the coronal axis using the transvaginal approach          | 4.47<br>(0.83)          | High                             | 4.44<br>(0.89)          | High                             |
| Identifies uterus in the sagittal axis using the transvaginal approach         | 4.47<br>(0.83)          | High                             | 4.44<br>(0.89)          | High                             |
| Identifies bladder                                                             | 4.87<br>(0.35)          | High                             | 4.94<br>(0.25)          | High                             |
| Identifies ovaries                                                             | n/a                     | n/a                              | 4.19<br>(0.66)          | High                             |
| Identifies right ovary                                                         | 4.00<br>(1.00)          | Low                              | 4.00<br>(0.82)          | High                             |
| Identifies left ovary                                                          | 4.00<br>(1.00)          | Low                              | 4.00<br>(0.82)          | High                             |
| Identifies Pouch of Douglas                                                    | 4.73<br>(0.59)          | High                             | 4.88<br>(0.34)          | High                             |
| Identifies endometrial stripe                                                  | 4.67<br>(0.49)          | High                             | 4.88<br>(0.34)          | High                             |
| Identifies cervix                                                              | 4.33<br>(0.82)          | High                             | 4.44<br>(0.81)          | High                             |
| First Trimester Intrauterine Pregnancy - Identifies gestational sac            | 4.8<br>(0.56)           | High                             | 4.94<br>(0.25)          | High                             |
| First Trimester Intrauterine Pregnancy - Identifies yolk sac                   | 4.93<br>(0.26)          | High                             | 4.94<br>(0.25)          | High                             |
| First Trimester Intrauterine Pregnancy - Identifies fetal pole                 | 4.8<br>(0.41)           | High                             | 4.88<br>(0.34)          | High                             |
| First Trimester Intrauterine Pregnancy - Identifies fetal heart rate           | 4.6<br>(0.83)           | High                             | 4.75<br>(0.77)          | High                             |
| First Trimester Intrauterine Pregnancy - Measure fetal heart rate using M-mode | 4.53<br>(0.83)          | High                             | 4.69<br>(0.79)          | High                             |

|                                                                                                                                                  |                |     |                |      |
|--------------------------------------------------------------------------------------------------------------------------------------------------|----------------|-----|----------------|------|
| First Trimester Intrauterine Pregnancy - Identifies thickness of myometrium between gestation sac and the uterine wall                           | 3.73<br>(1.22) | Low | 3.69<br>(1.01) | Low  |
| First Trimester Intrauterine Pregnancy - Performs crown-rump length measurement to estimate gestational age                                      | 3.8<br>(1.37)  | Low | 3.81<br>(0.83) | High |
| First Trimester Intrauterine Pregnancy - identifies molar pregnancy                                                                              | 3.67<br>(1.11) | Low | 3.5<br>(0.73)  | Low  |
| Third Trimester Intrauterine Pregnancy - Demonstrates use of pulse wave doppler to evaluate umbilical artery blood flow in high-risk pregnancies | 1.47<br>(0.52) | Low | 1.19<br>(0.4)  | Low  |
| Third Trimester Intrauterine Pregnancy - Calculates Estimated Fetal Weights                                                                      | 1.47<br>(0.52) | Low | 1.13<br>(0.34) | Low  |
| Third Trimester Intrauterine Pregnancy - Determines fetal lie                                                                                    | 3.07<br>(1.49) | Low | 3.13<br>(1.15) | Low  |

| Obstetrics & Gynecology: Pathology                                                           | Round 1<br>Mean<br>(SD) | Round 1<br>Level of<br>Agreement | Round 2<br>Mean<br>(SD) | Round 2<br>Level of<br>Agreement |
|----------------------------------------------------------------------------------------------|-------------------------|----------------------------------|-------------------------|----------------------------------|
| Ovarian Cyst - Identifies cystic structure within ovaries                                    | 3.67<br>(0.72)          | Low                              | 3.63<br>(0.72)          | Low                              |
| Ovarian Cyst - Identifies simple cyst (anechoic vs hypoechoic)                               | 3.4<br>(0.83)           | Low                              | 3.44<br>(0.73)          | Low                              |
| Ovarian Cyst - Identifies complex cyst (loculated, anechoic, hypoechoic or hyperechoic)      | 3.27<br>(0.80)          | Low                              | 3.38<br>(0.81)          | Low                              |
| Ovarian Cyst - identifies adnexal mass                                                       | 3.53<br>(0.74)          | Low                              | 2.44<br>(0.81)          | Low                              |
| Ovarian Cyst - Identified tubo-ovarian abscess                                               | 3.07<br>(0.8)           | Low                              | 3.19<br>(0.54)          | Low                              |
| Ovarian Cyst - Identifies echogenic fluid in the cul-de-sac                                  | 4.53<br>(0.64)          | High                             | 4.75<br>(0.45)          | High                             |
| Ovarian Torsion - Demonstrates use of power doppler to evaluate ovarian blood flow           | 2.8<br>(0.68)           | Low                              | 2.44<br>(0.81)          | Low                              |
| Ovarian Torsion - Demonstrates use of pulse wave doppler to evaluate ovarian blood flow      | 2.67<br>(0.98)          | Low                              | 2.31<br>(0.79)          | Low                              |
| Ovarian Torsion - Identifies arterial wave form on pulse wave doppler of ovarian vasculature | 2.53<br>(0.92)          | Low                              | 2.25<br>(0.68)          | Low                              |

|                                                                                            |                |      |                |      |
|--------------------------------------------------------------------------------------------|----------------|------|----------------|------|
| Ovarian Torsion - Identifies venous wave form on pulse wave doppler of ovarian vasculature | 2.4<br>(0.63)  | Low  | 2.19<br>(0.66) | Low  |
| Ectopic Pregnancy - Identifies empty uterus in setting of positive pregnancy test          | 5.00<br>(0.00) | High | 4.94<br>(0.25) | High |
| Ectopic Pregnancy - Identifies pseudogestational sac in setting of positive pregnancy test | 4.27<br>(1.16) | High | 4.44<br>(0.51) | High |
| Ectopic Pregnancy - Identifies yolk sac/fetal pole in a non-uterine location               | 4.47<br>(0.92) | High | 4.44<br>(0.63) | High |
| Ectopic Pregnancy - Identifies free fluid in the Pouch of Douglas                          | 5.00<br>(0.00) | High | 4.94<br>(0.25) | High |
| Ectopic Pregnancy - Identifies free fluid in Morison's pouch                               | 5.00<br>(0.00) | High | 4.88<br>(0.34) | High |

| Testicular: Normal Anatomy                     | Round 1 Mean (SD) | Round 1 Level of Agreement | Round 2 Mean (SD) | Round 2 Level of Agreement |
|------------------------------------------------|-------------------|----------------------------|-------------------|----------------------------|
| Normal Anatomy - Identifies testicle           | 4.40<br>(0.74)    | High                       | 4.38<br>(0.89)    | High                       |
| Normal Anatomy - Identifies epididymis         | 3.73<br>(0.96)    | Low                        | 3.56<br>(1.15)    | Low                        |
| Normal Anatomy - Identifies scrotal raphae     | 2.67<br>(1.11)    | Low                        | 2.38<br>(0.81)    | Low                        |
| Normal Anatomy - Identifies mediastinum testis | 2.73<br>(1.1)     | Low                        | 2.38<br>(0.89)    | Low                        |

| Testicular: Pathology                                                                              | Round 1 Mean (SD) | Round 1 Level of Agreement | Round 2 Mean (SD) | Round 2 Level of Agreement |
|----------------------------------------------------------------------------------------------------|-------------------|----------------------------|-------------------|----------------------------|
| Testicular Torsion - Demonstrates use of power doppler to evaluate testicular blood flow           | 3.67<br>(1.05)    | Low                        | 3.5<br>(0.73)     | Low                        |
| Testicular Torsion - Demonstrates use of pulse-wave doppler to evaluate testicular blood flow      | 2.93<br>(1.1)     | Low                        | 2.69<br>(1.01)    | Low                        |
| Testicular Torsion - Identifies arterial wave form on pulse wave doppler of testicular vasculature | 2.80<br>(1.15)    | Low                        | 2.56<br>(0.81)    | Low                        |

|                                                                                                  |                |     |                |     |
|--------------------------------------------------------------------------------------------------|----------------|-----|----------------|-----|
| Testicular Torsion - Identifies venous wave form on pulse wave doppler of testicular vasculature | 2.67<br>(0.98) | Low | 2.50<br>(0.73) | Low |
| Testicular Torsion - Demonstrates side-by-side view of testes to compare blood flow              | 3.73<br>(1.03) | Low | 3.38<br>(1.09) | Low |
| Hydrocele/Varicocele/Hernia - Identifies hydrocele                                               | 3.47<br>(1.25) | Low | 3.06<br>(0.93) | Low |
| Hydrocele/Varicocele/Hernia - Identifies varicocele                                              | 2.93<br>(1.16) | Low | 2.50<br>(0.89) | Low |
| Hydrocele/Varicocele/Hernia - Identifies contents of inguinal hernia present in scrotum          | 3.20<br>(1.08) | Low | 2.81<br>(1.05) | Low |
| Epididymitis/Orchitis - Identifies hypervascular power doppler pattern of epididymitis           | 3.20<br>(1.08) | Low | 2.69<br>(1.08) | Low |
| Epididymitis/Orchitis - Identifies heterogenous echotexture of epididymitis                      | 2.87<br>(1.3)  | Low | 2.56<br>(0.89) | Low |
| Epididymitis/Orchitis - Identifies peri-epididymal fluid                                         | 2.73<br>(1.28) | Low | 2.31<br>(0.7)  | Low |
| Epididymitis/Orchitis - Identifies hypervascular power doppler pattern of orchitis               | 3.00<br>(1.07) | Low | 2.63<br>(0.96) | Low |
| Epididymitis/Orchitis - Identifies heterogenous echotexture of orchitis                          | 2.73<br>(1.22) | Low | 2.31<br>(0.70) | Low |

| Ocular: Normal Anatomy        | Round 1<br>Mean<br>(SD) | Round 1<br>Level of<br>Agreement | Round 2<br>Mean<br>(SD) | Round 2<br>Level of<br>Agreement |
|-------------------------------|-------------------------|----------------------------------|-------------------------|----------------------------------|
| Identifies anterior chamber   | 4.67<br>(0.62)          | High                             | 4.75<br>(0.45)          | High                             |
| Identifies posterior chamber  | 4.87<br>(0.35)          | High                             | 4.56<br>(1.03)          | High                             |
| Identifies pupil              | 4.07<br>(1.03)          | Low                              | 4.19<br>(0.66)          | High                             |
| Identifies lens               | 4.6<br>(0.91)           | High                             | 4.56<br>(0.63)          | High                             |
| Identifies optic nerve sheath | 4.53<br>(0.83)          | High                             | 4.63<br>(0.50)          | High                             |
| Identifies macula             | 3.4<br>(1.18)           | Low                              | 3.25<br>(1.13)          | Low                              |

| Ocular: Pathology                                                                                          | Round 1 Mean (SD) | Round 1 Level of Agreement | Round 2 Mean (SD) | Round 2 Level of Agreement |
|------------------------------------------------------------------------------------------------------------|-------------------|----------------------------|-------------------|----------------------------|
| Posterior Chamber - Identifies vitreous hemorrhage                                                         | 4.40 (0.63)       | High                       | 4.44 (0.63)       | High                       |
| Posterior Chamber - Identifies vitreous detachment                                                         | 4.53 (0.64)       | High                       | 4.63 (0.5)        | High                       |
| Posterior Chamber - Identifies retinal detachment                                                          | 4.8 (0.41)        | High                       | 4.81 (0.4)        | High                       |
| Posterior Chamber - Distinguishes vitreous from retinal detachment via visualization of optic nerve sheath | 4.53 (0.64)       | High                       | 4.25 (0.77)       | High                       |
| Posterior Chamber - Demonstrates dynamic evaluation of the eye via patient eye movement                    | 4.33 (0.82)       | High                       | 4.50 (0.52)       | High                       |
| Posterior Chamber - Differentiates macula on and macula off retinal detachment                             | 2.93 (1.16)       | Low                        | 2.75 (1.13)       | Low                        |
| Other - Measures optic nerve sheath accurately (3 mm from posterior chamber)                               | 3.73 (0.96)       | Low                        | 3.50 (0.97)       | Low                        |
| Other – Identifies globe rupture                                                                           | 4.07 (0.88)       | High                       | 3.88 (0.89)       | High                       |

| Neurology                                                                              | Round 1 Mean (SD) | Round 1 Level of Agreement | Round 2 Mean (SD) | Round 2 Level of Agreement |
|----------------------------------------------------------------------------------------|-------------------|----------------------------|-------------------|----------------------------|
| Lumbar Puncture - Uses transcranial doppler to evaluate cerebral blood flow velocities | 1.53 (0.64)       | Low                        | 1.19 (0.4)        | Low                        |
| Lumbar Puncture - Identify spinous process                                             | 3.33 (1.23)       | Low                        | 2.75 (1.06)       | Low                        |
| Lumbar Puncture - Identify ligamentum flavum                                           | 2.33 (0.82)       | Low                        | 2.00 (0.73)       | Low                        |
| Lumbar Puncture - Identify laminae                                                     | 2.40 (0.74)       | Low                        | 2.00 (1.03)       | Low                        |
| Lumbar Puncture - Identify epidural space                                              | 2.20 (0.77)       | Low                        | 1.75 (0.68)       | Low                        |
| Lumbar Puncture - Identify subarachnoid space                                          | 2.07 (0.59)       | Low                        | 1.75 (0.68)       | Low                        |
| Lumbar Puncture - Identify posterior longitudinal ligament                             | 2.07 (0.59)       | Low                        | 2.00 (0.73)       | Low                        |

| Venous: Normal Anatomy                                                          | Round 1 Mean (SD) | Round 1 Level of Agreement | Round 2 Mean (SD) | Round 2 Level of Agreement |
|---------------------------------------------------------------------------------|-------------------|----------------------------|-------------------|----------------------------|
| Identifies greater saphenous vein                                               | 4.53 (0.83)       | High                       | 4.69 (0.6)        | High                       |
| Identifies common femoral vein                                                  | 4.8 (0.41)        | High                       | 4.81 (0.54)       | High                       |
| Identifies deep femoral vein                                                    | 4.73 (0.46)       | High                       | 4.75 (0.58)       | High                       |
| Identifies superficial femoral vein                                             | 4.73 (0.46)       | High                       | 4.75 (0.58)       | High                       |
| Identifies popliteal vein                                                       | 4.73 (0.46)       | High                       | 4.81 (0.54)       | High                       |
| Identifies popliteal trifurcation (anterior tibial, posterior tibial, peroneal) | 4.2 (0.56)        | High                       | 4.13 (0.72)       | High                       |

| Venous: Pathology                                                     | Round 1 Mean (SD) | Round 1 Level of Agreement | Round 2 Mean (SD) | Round 2 Level of Agreement |
|-----------------------------------------------------------------------|-------------------|----------------------------|-------------------|----------------------------|
| DVT - Identifies compressibility of a normal vessel                   | 4.87 (0.35)       | High                       | 4.81 (0.54)       | High                       |
| DVT - Identifies lack of compressibility in the setting of a DVT      | 4.87 (0.35)       | High                       | 4.88 (0.50)       | High                       |
| DVT - Performs compression at areas of venous bifurcation             | 4.33 (0.98)       | High                       | 4.25 (0.77)       | High                       |
| DVT - Utilizes color augmentation for evaluation of venous structures | 3.13 (1.13)       | Low                        | 2.94 (0.93)       | Low                        |
| DVT - Identifies presence of DVT in upper extremity                   | n/a               | n/a                        | 3.00 (1.03)       | Low                        |
| DVT - Identifies presence of DVT in lower extremity                   | n/a               | n/a                        | 4.69 (0.60)       | High                       |

| Biliary: Normal Anatomy             | Round 1 Mean (SD) | Round 1 Level of Agreement | Round 2 Mean (SD) | Round 2 Level of Agreement |
|-------------------------------------|-------------------|----------------------------|-------------------|----------------------------|
| Identifies liver                    | 4.87 (0.35)       | High                       | 4.94 (0.25)       | High                       |
| Identifies gallbladder in long axis | 4.87 (0.35)       | High                       | 4.94 (0.25)       | High                       |

|                                      |                |      |                |      |
|--------------------------------------|----------------|------|----------------|------|
| Identifies gallbladder in short axis | 4.87<br>(0.35) | High | 4.94<br>(0.25) | High |
| Identifies main lobar fissure        | 3.47<br>(0.99) | Low  | 3.63<br>(0.96) | Low  |
| Identifies portal triad              | 4.67<br>(0.49) | High | 4.63<br>(0.50) | High |
| Identifies portal vein               | 4.67<br>(0.49) | High | 4.56<br>(0.51) | High |
| Identifies hepatic artery            | 4.27<br>(0.88) | High | 4.06<br>(0.57) | High |
| Identifies common bile duct          | 4.33<br>(0.62) | High | 4.19<br>(0.75) | High |

| Biliary: Pathology                                                                         | Round 1<br>Mean<br>(SD) | Round 1<br>Level of<br>Agreement | Round 2<br>Mean<br>(SD) | Round 2<br>Level of<br>Agreement |
|--------------------------------------------------------------------------------------------|-------------------------|----------------------------------|-------------------------|----------------------------------|
| Gallstones - Identifies gallstones                                                         | 4.93<br>(0.26)          | High                             | 4.94<br>(0.25)          | High                             |
| Gallstones - Identifies gallstone characteristics of echogenicity, shadowing, and mobility | 4.87<br>(0.35)          | High                             | 4.94<br>(0.25)          | High                             |
| Gallstones - Identifies Wall-Echo-Shadow (WES) sign                                        | 4.27<br>(0.8)           | High                             | 4.13<br>(0.62)          | High                             |
| Gallstones - Identifies gallbladder sludge                                                 | 4.13<br>(0.83)          | Medium                           | 4 (0.73)                | High                             |
| Cholecystitis - Identifies pericholecystic fluid                                           | 4.8<br>(0.56)           | High                             | 4.81<br>(0.54)          | High                             |
| Cholecystitis - Identifies increase size of gallbladder wall                               | 4.67<br>(0.62)          | High                             | 4.63<br>(0.72)          | High                             |
| Cholecystitis - Measures anterior gallbladder wall in short axis                           | 4.4<br>(0.83)           | High                             | 4.44<br>(0.73)          | High                             |
| Cholecystitis - Identifies sonographic murphy's sign                                       | 4.33<br>(0.98)          | High                             | 4.44<br>(0.73)          | High                             |
| Choledocholithiasis/cholangitis - Identifies enlarged common bile duct                     | 4.2<br>(0.68)           | High                             | 4.13<br>(0.96)          | High                             |
| Choledocholithiasis/cholangitis - Measures common bile duct                                | 3.93<br>(0.70)          | High                             | 4.06<br>(0.77)          | High                             |
| Choledocholithiasis/cholangitis - Identifies stone in common bile duct                     | 2.73<br>(0.96)          | Low                              | 2.56<br>(0.81)          | Low                              |



| Renal: Normal Anatomy                                        | Round 1 Mean (SD) | Round 1 Level of Agreement | Round 2 Mean (SD) | Round 2 Level of Agreement |
|--------------------------------------------------------------|-------------------|----------------------------|-------------------|----------------------------|
| Identifies renal cortex                                      | 4.53 (0.52)       | High                       | 4.69 (0.48)       | High                       |
| Identifies renal medulla                                     | 4.4 (0.63)        | High                       | 4.69 (0.48)       | High                       |
| Identifies renal pelvis                                      | 4.87 (0.35)       | High                       | 4.88 (0.34)       | High                       |
| Identifies ureter                                            | 4.33 (0.82)       | High                       | 4.13 (0.5)        | High                       |
| Identifies bladder                                           | 4.87 (0.35)       | High                       | 4.88 (0.34)       | High                       |
| Identifies ureteral papillae on posterior surface of bladder | 2.93 (1.39)       | Low                        | 2.69 (1.25)       | Low                        |

| Renal: Pathology                                                                                      | Round 1 Mean (SD) | Round 1 Level of Agreement | Round 2 Mean (SD) | Round 2 Level of Agreement |
|-------------------------------------------------------------------------------------------------------|-------------------|----------------------------|-------------------|----------------------------|
| Hydronephrosis - Identifies mild hydronephrosis                                                       | 4.73 (0.46)       | High                       | 4.75 (0.45)       | High                       |
| Hydronephrosis - Identifies moderate hydronephrosis                                                   | 4.93 (0.26)       | High                       | 4.94 (0.25)       | High                       |
| Hydronephrosis - Identifies severe hydronephrosis                                                     | 4.93 (0.26)       | High                       | 4.94 (0.25)       | High                       |
| Hydronephrosis - Identifies mimics of hydronephrosis                                                  | n/a               | n/a                        | 4.25 (0.86)       | High                       |
| Hydronephrosis - Uses color to differentiate hydronephrosis from vasculature                          | n/a               | n/a                        | 4.56 (0.51)       | High                       |
| Kidney Stone - Identifies intra-renal stones                                                          | 2.80 (0.68)       | Low                        | 2.75 (0.58)       | Low                        |
| Kidney Stone - Identifies stone characteristics of echogenicity and shadowing                         | 3.53 (1.19)       | Low                        | 3.63 (0.89)       | Low                        |
| Kidney Stone - Identifies renal stone at ureterovesicular junction                                    | 3.67 (1.18)       | Low                        | 3.56 (0.81)       | Low                        |
| Kidney Stone - Identifies twinkle artifact when performing color doppler at ureterovesicular junction | 3.13 (1.13)       | Low                        | 3.19 (0.83)       | Low                        |
| Other - Demonstrates renal restrictive indices using pulse wave doppler                               | 1.8 (0.56)        | Low                        | 1.44 (0.51)       | Low                        |
| Other - Identifies renal cysts                                                                        | 3.8 (0.86)        | Low                        | 3.88 (1.02)       | Medium                     |

|                                                                                       |                |     |                |     |
|---------------------------------------------------------------------------------------|----------------|-----|----------------|-----|
| Other - Differentiates simple vs complex cyst                                         | 3.07<br>(1.03) | Low | 3.19<br>(1.17) | Low |
| Other - Identify mixed echogenicity of renal pelvices in acute pyelonephritis         | 2.33<br>(0.62) | Low | 1.81<br>(0.66) | Low |
| Other - identify debris in renal collecting system indicative of acute pyelonephritis | 2.2<br>(0.56)  | Low | 1.88<br>(0.81) | Low |
| Other - Identify fluid collection concerning for development of acute lobar nephronia | 1.87<br>(0.74) | Low | 1.44<br>(0.63) | Low |

| Musculoskeletal: Normal Anatomy                                           | Round 1<br>Mean<br>(SD) | Round 1<br>Level of<br>Agreement | Round 2<br>Mean<br>(SD) | Round 2<br>Level of<br>Agreement |
|---------------------------------------------------------------------------|-------------------------|----------------------------------|-------------------------|----------------------------------|
| Identifies muscle appearance                                              | 4.53<br>(0.92)          | High                             | 4.5<br>(0.82)           | High                             |
| Identifies tendon appearance - fibrillar, attaches to muscle/bone         | 4.47<br>(1.06)          | High                             | 4.56<br>(0.81)          | High                             |
| Identifies peripheral nerve appearance - anisotropy                       | 4.13<br>(0.92)          | High                             | 4.19<br>(0.66)          | High                             |
| Identifies peripheral nerve appearance - hyperechoic honeycomb            | 4.2<br>(0.86)           | High                             | 4.31<br>(0.60)          | High                             |
| Identifies normal appearance of dermis                                    | 4 (1.13)                | Low                              | 4.13<br>(0.89)          | High                             |
| Identifies appearance of lymph node                                       | 4.2<br>(0.86)           | High                             | 4.31<br>(0.60)          | High                             |
| Identifies bone as hyperechoic line in longitudinal and transverse planes | 4.53<br>(0.92)          | High                             | 4.69<br>(0.79)          | High                             |

| Musculoskeletal: Pathology                                 | Round 1<br>Mean<br>(SD) | Round 1<br>Level of<br>Agreement | Round 2<br>Mean<br>(SD) | Round 2<br>Level of<br>Agreement |
|------------------------------------------------------------|-------------------------|----------------------------------|-------------------------|----------------------------------|
| General - Identifies breaks in cortex to indicate fracture | 3.87<br>(1.13)          | Low                              | 3.56<br>(0.73)          | Low                              |
| General - Identifies joint dislocation                     | 4.13<br>(0.74)          | High                             | 3.88<br>(0.62)          | High                             |
| General - Identifies successful joint reduction            | 4.07<br>(0.8)           | Medium                           | 3.75<br>(0.58)          | Medium                           |
| General - Identifies joint effusion                        | 4.67<br>(0.49)          | High                             | 4.81<br>(0.40)          | High                             |
| Soft Tissue - Identifies cobblestoning                     | 4.8<br>(0.41)           | High                             | 4.88<br>(0.34)          | High                             |

|                                                                           |                |        |                |        |
|---------------------------------------------------------------------------|----------------|--------|----------------|--------|
| Soft Tissue - Identifies other causes of cobblestoning - lymphedema/edema | 4.73<br>(0.46) | High   | 4.81<br>(0.54) | High   |
| Soft Tissue - Identifies appearance of abscess                            | 4.87<br>(0.35) | High   | 4.94<br>(0.25) | High   |
| Soft Tissue - Uses color to help identify abscess                         | n/a            | n/a    | 3.88<br>(1.15) | Low    |
| Soft Tissue - Identifies air echoes as sign of necrotizing fasciitis      | 4.6<br>(0.51)  | High   | 4.5<br>(0.82)  | High   |
| Soft Tissue - Identifies foreign objects in subcutaneous tissue           | 4.27<br>(0.59) | High   | 3.94<br>(0.77) | High   |
| Shoulder - Identifies humeral head                                        | 4.40<br>(0.91) | High   | 3.88<br>(0.96) | High   |
| Shoulder - Identifies glenoid                                             | 4.33<br>(0.90) | High   | 3.88<br>(0.96) | High   |
| Shoulder - Identifies anterior shoulder dislocation                       | 4.2<br>(0.86)  | High   | 3.75<br>(1.00) | Medium |
| Shoulder - Identifies posterior shoulder dislocation                      | 4.13<br>(0.83) | High   | 3.69<br>(1.01) | Low    |
| Shoulder - Identifies rotator cuff tear                                   | 1.93<br>(0.8)  | Low    | 1.63<br>(0.62) | Low    |
| Shoulder - Confirms successful reduction on post-reduction ultrasound     | 3.87<br>(0.92) | High   | 3.44<br>(0.96) | Low    |
| Knee - Identifies patella                                                 | 4.27<br>(0.8)  | High   | 3.94<br>(1.00) | High   |
| Knee - Identifies femur                                                   | 4.27<br>(0.8)  | High   | 3.94<br>(1.00) | High   |
| Knee - Identifies tibia                                                   | 4.27<br>(0.8)  | High   | 3.94<br>(1.00) | High   |
| Knee - Identifies patellar tendon                                         | 4.27<br>(0.8)  | High   | 3.94<br>(1.00) | High   |
| Knee - Identifies medial/lateral meniscus                                 | 2.33<br>(0.82) | Low    | 1.75<br>(0.58) | Low    |
| Knee - Identifies patellar tendon rupture                                 | 3.93<br>(0.7)  | Medium | 3.38<br>(0.96) | Low    |
| Ankle - Identifies medial/lateral malleolus                               | 3 (0.93)       | Low    | 3.19<br>(1.05) | Low    |
| Ankle - Identifies calcaneus                                              | 3.13<br>(0.92) | Low    | 3.19<br>(1.05) | Low    |
| Ankle - Identifies tarsal bones                                           | 2.6<br>(0.74)  | Low    | 2.31<br>(0.87) | Low    |
| Ankle - Identifies achilles tendon                                        | 4.07<br>(0.70) | High   | 4.06<br>(0.68) | High   |

|                                            |                |      |                |      |
|--------------------------------------------|----------------|------|----------------|------|
| Ankle - Identifies achilles tendon rupture | 4.13<br>(0.74) | High | 4.06<br>(0.57) | High |
|--------------------------------------------|----------------|------|----------------|------|

| Head & Neck                                                             | Round 1<br>Mean<br>(SD) | Round 1<br>Level of<br>Agreement | Round 2<br>Mean<br>(SD) | Round 2<br>Level of<br>Agreement |
|-------------------------------------------------------------------------|-------------------------|----------------------------------|-------------------------|----------------------------------|
| Identifies appearance of peritonsillar abscess using endocavitary probe | 3.93<br>(0.59)          | High                             | 3.75<br>(0.58)          | High                             |
| Identifies presence of intra-oral abscesses                             | n/a                     | n/a                              | 3.56<br>(0.51)          | Low                              |

| Bowel: Normal Anatomy               | Round 1<br>Mean<br>(SD) | Round 1<br>Level of<br>Agreement | Round 2<br>Mean<br>(SD) | Round 2<br>Level of<br>Agreement |
|-------------------------------------|-------------------------|----------------------------------|-------------------------|----------------------------------|
| Identifies small bowel              | 3.47<br>(0.92)          | Low                              | 3.56<br>(0.73)          | Low                              |
| Identifies plica circularis         | 2.87<br>(0.92)          | Low                              | 3.06<br>(0.93)          | Low                              |
| Identifies colon - air interference | 3.2<br>(0.68)           | Low                              | 3.31<br>(0.7)           | Low                              |
| Identifies haustra                  | 2.93<br>(0.70)          | Low                              | 3 (0.89)                | Low                              |
| Identifies blind-ending appendix    | 3.27<br>(0.70)          | Low                              | 3.06<br>(0.77)          | Low                              |
| Identifies iliac artery             | 3.4<br>(0.91)           | Low                              | 3.25<br>(0.68)          | Low                              |
| Identifies psoas muscle             | 3.13<br>(0.74)          | Low                              | 2.94<br>(0.57)          | Low                              |

| Bowel: Pathology                                                                               | Round 1<br>Mean<br>(SD) | Round 1<br>Level of<br>Agreement | Round 2<br>Mean<br>(SD) | Round 2<br>Level of<br>Agreement |
|------------------------------------------------------------------------------------------------|-------------------------|----------------------------------|-------------------------|----------------------------------|
| Small Bowel Obstruction - Measures small bowel wall                                            | 3.27<br>(0.96)          | Low                              | 3.00<br>(0.73)          | Low                              |
| Small Bowel Obstruction - Measures small bowel diameter                                        | 3.73<br>(1.03)          | Low                              | 3.31<br>(0.79)          | Low                              |
| Small Bowel Obstruction - Identifies to and fro peristalsis as sign of small bowel obstruction | 3.93<br>(1.1)           | Low                              | 3.94<br>(0.77)          | High                             |
| Appendicitis - Evaluates appendix with compression                                             | 3.47<br>(0.74)          | Low                              | 3.19<br>(0.83)          | Low                              |

|                                                                                                     |                |     |                |     |
|-----------------------------------------------------------------------------------------------------|----------------|-----|----------------|-----|
| Appendicitis - Identifies appendicolith                                                             | 3.27<br>(0.96) | Low | 3 (0.63)       | Low |
| Appendicitis - Identifies free fluid surround appendix                                              | 3.53<br>(0.99) | Low | 3.38<br>(0.89) | Low |
| Intussusception - Identifies hypoechoic edema around bowel wall                                     | 3.07<br>(0.70) | Low | 2.81<br>(0.66) | Low |
| Intussusception - Identifies layers of hypoechoic and hyperechoic bowel wall indicating telescoping | 3.00<br>(0.76) | Low | 2.88<br>(0.81) | Low |
| Other - Measures pylorus length and width                                                           | 2.67<br>(0.98) | Low | 2.38<br>(0.62) | Low |
| Other - Identifies hypertrophic pyloric stenosis                                                    | 2.73<br>(1.03) | Low | 2.25<br>(0.58) | Low |
| Other - Identifies ingested foreign bodies in stomach                                               | 2.2<br>(0.86)  | Low | 2.06<br>(0.68) | Low |

| Airway                                                                                      | Round 1<br>Mean<br>(SD) | Round 1<br>Level of<br>Agreement | Round 2<br>Mean<br>(SD) | Round 2<br>Level of<br>Agreement |
|---------------------------------------------------------------------------------------------|-------------------------|----------------------------------|-------------------------|----------------------------------|
| General Principles - Identify thyroid cartilage in transverse and longitudinal plane        | 3.2<br>(1.21)           | Low                              | 3.06<br>(1.00)          | Low                              |
| General Principles - Identify cricoid cartilage in transverse and longitudinal plane        | 3.33<br>(1.23)          | Low                              | 3.06<br>(1.00)          | Low                              |
| General Principles - Identify trachea and esophagus in transverse plane                     | 3.4 (1.3)               | Low                              | 3.31<br>(0.95)          | Low                              |
| General Principles - Identify thyroid                                                       | 3.47<br>(1.25)          | Low                              | 3.38<br>(1.09)          | Low                              |
| General Principles - Identify endotracheal tube in trachea post intubation                  | 2.87<br>(1.30)          | Low                              | 2.69<br>(0.87)          | Low                              |
| General Principles - Identifies cricothyroid membrane for cricothyroidotomy                 | 3.47<br>(1.13)          | Low                              | 3.25<br>(0.93)          | Low                              |
| General Principles – Identifies endotracheal tube (ETT) incorrectly placed in the esophagus | 3.27<br>(1.16)          | Low                              | 2.88<br>(0.96)          | Low                              |
| General Principles - Confirm airway placement by evaluating diaphragm motion                | 2.53<br>(1.19)          | Low                              | 2.19<br>(0.83)          | Low                              |
| General Principles - Utilizes color doppler imaging to identify placement of ETT            | 1.80<br>(0.86)          | Low                              | 1.56<br>(0.63)          | Low                              |

| Procedures                                                                 | Round 1 Mean (SD) | Round 1 Level of Agreement | Round 2 Mean (SD) | Round 2 Level of Agreement |
|----------------------------------------------------------------------------|-------------------|----------------------------|-------------------|----------------------------|
| Needle Guidance - Identifies and tracks needle in long axis                | 4.87 (0.35)       | High                       | 4.88 (0.50)       | High                       |
| Needle Guidance - Identifies and tracks needle tip in short axis           | 4.93 (0.26)       | High                       | 4.75 (0.58)       | High                       |
| Needle Guidance - Identifies important nearby structures                   | 4.93 (0.26)       | High                       | 4.88 (0.5)        | High                       |
| Needle Guidance - Confirms location of guidewire within vessel             | 4.73 (0.46)       | High                       | 4.88 (0.5)        | High                       |
| Needle Guidance - Confirms location of catheter within vessel              | 4.60 (0.51)       | High                       | 4.81 (0.54)       | High                       |
| Needle Guidance - Correctly identifies appropriate vessel                  | 4.93 (0.26)       | High                       | 4.88 (0.50)       | High                       |
| Needle Guidance - Correctly identifies size and location of vessel         | 4.87 (0.35)       | High                       | 4.88 (0.50)       | High                       |
| Needle Guidance - Identifies back-walling of needle or guidewire in vessel | 4.73 (0.59)       | High                       | 4.69 (0.60)       | High                       |
| Needle Guidance - Identifies needle going through and through vessel       | 4.8 (0.41)        | High                       | 4.81 (0.54)       | High                       |
| Fluid Drainage - Identifies anechoic or hypoechoic fluid pocket            | 4.93 (0.26)       | High                       | 4.88 (0.50)       | High                       |
| Procedures - Can place internal jugular CVC under ultrasound guidance      | 5.00 (0.00)       | High                       | 4.94 (0.25)       | High                       |
| Procedures - Can place subclavian CVC under ultrasound guidance            | 3.47 (1.13)       | Low                        | 3.38 (0.89)       | Low                        |
| Procedures - Can place femoral vein CVC under ultrasound guidance          | 4.80 (0.56)       | High                       | 4.88 (0.34)       | High                       |
| Procedures - Can place radial arterial line under ultrasound guidance      | 4.60 (0.51)       | High                       | 4.69 (0.48)       | High                       |
| Procedures - Can cannulate vessel in short and long axis                   | 4.67 (0.62)       | High                       | 4.75 (0.45)       | High                       |
| Procedures - Can place femoral arterial line under ultrasound guidance     | 4.60 (0.63)       | High                       | 4.75 (0.45)       | High                       |
| Procedures - Can drain peritonsillar abscess under ultrasound guidance     | 3.53 (0.99)       | Low                        | 3.00 (0.82)       | Low                        |
| Procedures - Can drain peritonsillar abscess with ultrasound assistance    | n/a               | n/a                        | 3.81 (0.75)       | Low                        |

|                                                                                            |                |        |                |        |
|--------------------------------------------------------------------------------------------|----------------|--------|----------------|--------|
| Procedures - Can perform thoracentesis under ultrasound guidance                           | 4.6<br>(0.74)  | High   | 4.63<br>(0.50) | High   |
| Procedures - Can perform paracentesis under ultrasound guidance                            | 4.87<br>(0.35) | High   | 4.50<br>(0.63) | High   |
| Procedures - Can perform paracentesis with ultrasound assistance                           | n/a            | n/a    | 4.75<br>(0.45) | High   |
| Procedures - Can perform arthrocentesis under ultrasound guidance                          | 4.60<br>(0.51) | High   | 4.44<br>(0.73) | High   |
| Procedures - Can perform lumbar puncture under ultrasound guidance                         | 3.20<br>(1.08) | Low    | 2.81<br>(0.66) | Low    |
| Procedures - Can perform pericardiocentesis under ultrasound guidance                      | 4.60<br>(0.74) | High   | 4.75<br>(0.45) | High   |
| Procedures - Can confirm placement of ETT after intubation under ultrasound guidance       | 2.47<br>(1.06) | Low    | 2.56<br>(1.03) | Low    |
| Procedures - Can confirm joint dislocation under ultrasound guidance                       | 3.60<br>(1.12) | Low    | 3.63<br>(0.81) | Medium |
| Procedures - Can perform nerve blocks under ultrasound guidance                            | 4.07<br>(0.80) | Medium | 4.19<br>(0.66) | High   |
| Procedures - Can place peripheral venous line under ultrasound guidance                    | 4.93<br>(0.26) | High   | 4.94<br>(0.25) | High   |
| Procedures - Confirm REBOA placement using contrast enhanced US                            | 1.4<br>(0.51)  | Low    | 1.44<br>(0.51) | Low    |
| Procedures - Identifies lung re-expansion and determine chest tube removal appropriateness | 2.67<br>(1.23) | Low    | 2.44<br>(1.09) | Low    |
| Procedures - Can perform intra-articular hip steroid injection under ultrasound guidance   | 2.13<br>(1.13) | Low    | 1.94<br>(0.85) | Low    |
| Procedures - Identifies Nasogastric tube in stomach under ultrasound guidance              | 2.20<br>(0.68) | Low    | 2.06<br>(0.68) | Low    |
| Procedures - Identifies intercostal space for chest tube placement                         | 3.20<br>(1.15) | Low    | 3.00<br>(0.97) | Low    |
